# Supplementary material for: Association of physician financial incentives with primary care enrolment of adults with serious mental illnesses in Ontario: a retrospective observational population-based study
Source: PubMed Central journal article supplement — CMAJ Open. 2023 Jan 10;11(1):E1–E12. doi: 10.9778/cmajo.20210190 (PMC9842098; doi:10.9778/cmajo.20210190), 2023-01-10
Supplement: open-2021-0190-1-at.pdf [file open-2021-0190-1-at.pdf]

## Appendix 1. Study participant flow

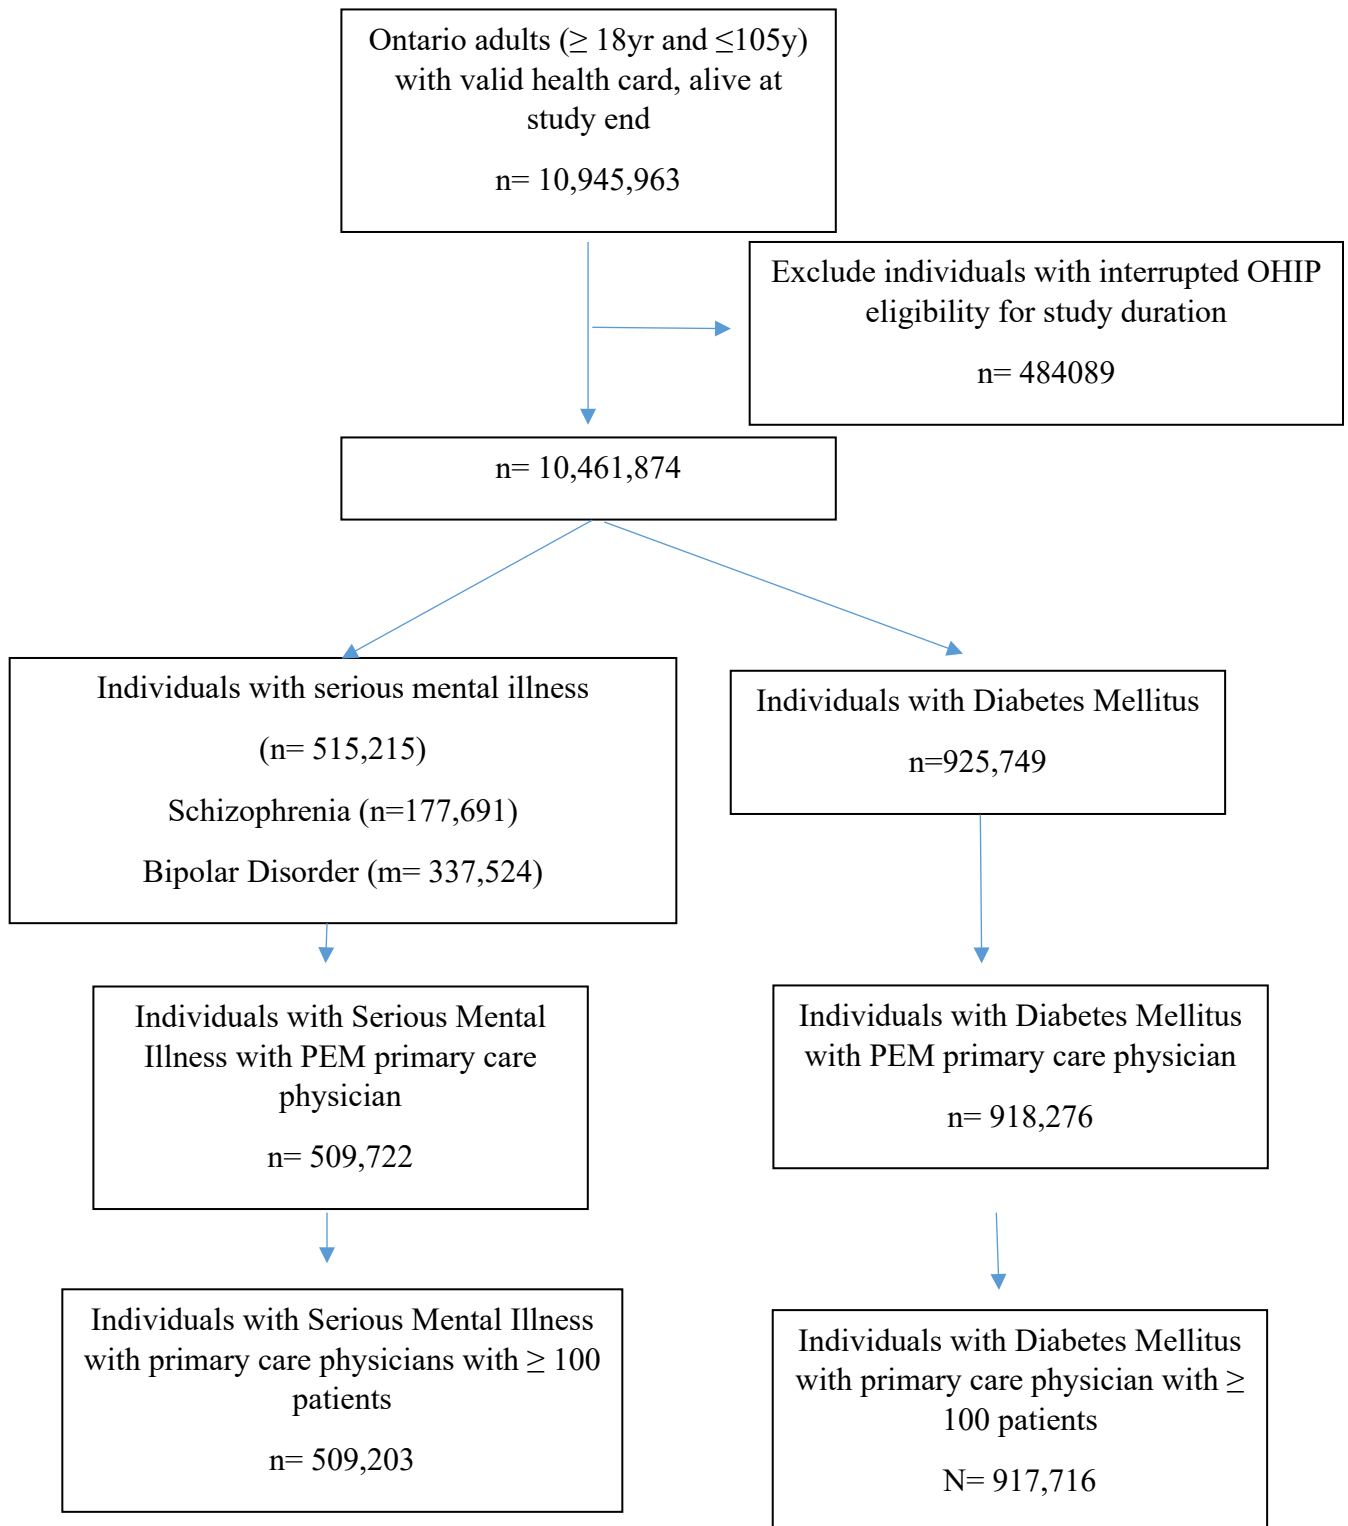

Appendix 1, as supplied by the authors. Appendix to: Bayoumi I, Whitehead M, Li W, et al. Association of physician financial incentives with primary care enrolment of adults with serious mental illnesses in Ontario: a retrospective observational population-based study. *CMAJ Open* 2023. doi:10.9778/cmajo.2021-0190. Copyright © 2023 The Author(s) or their employer(s). To receive this resource in an accessible format, please contact us at [cmajgroup@cmaj.ca](mailto:cmajgroup@cmaj.ca).
